# Supplementary material for: On-flight intercomparison of three miniature aerosol absorption sensors using Unmanned Aerial Systems (UAS)
Source: Copernicus journal article supplement (doi:10.5194/amt-2019-191), 2019-06-24

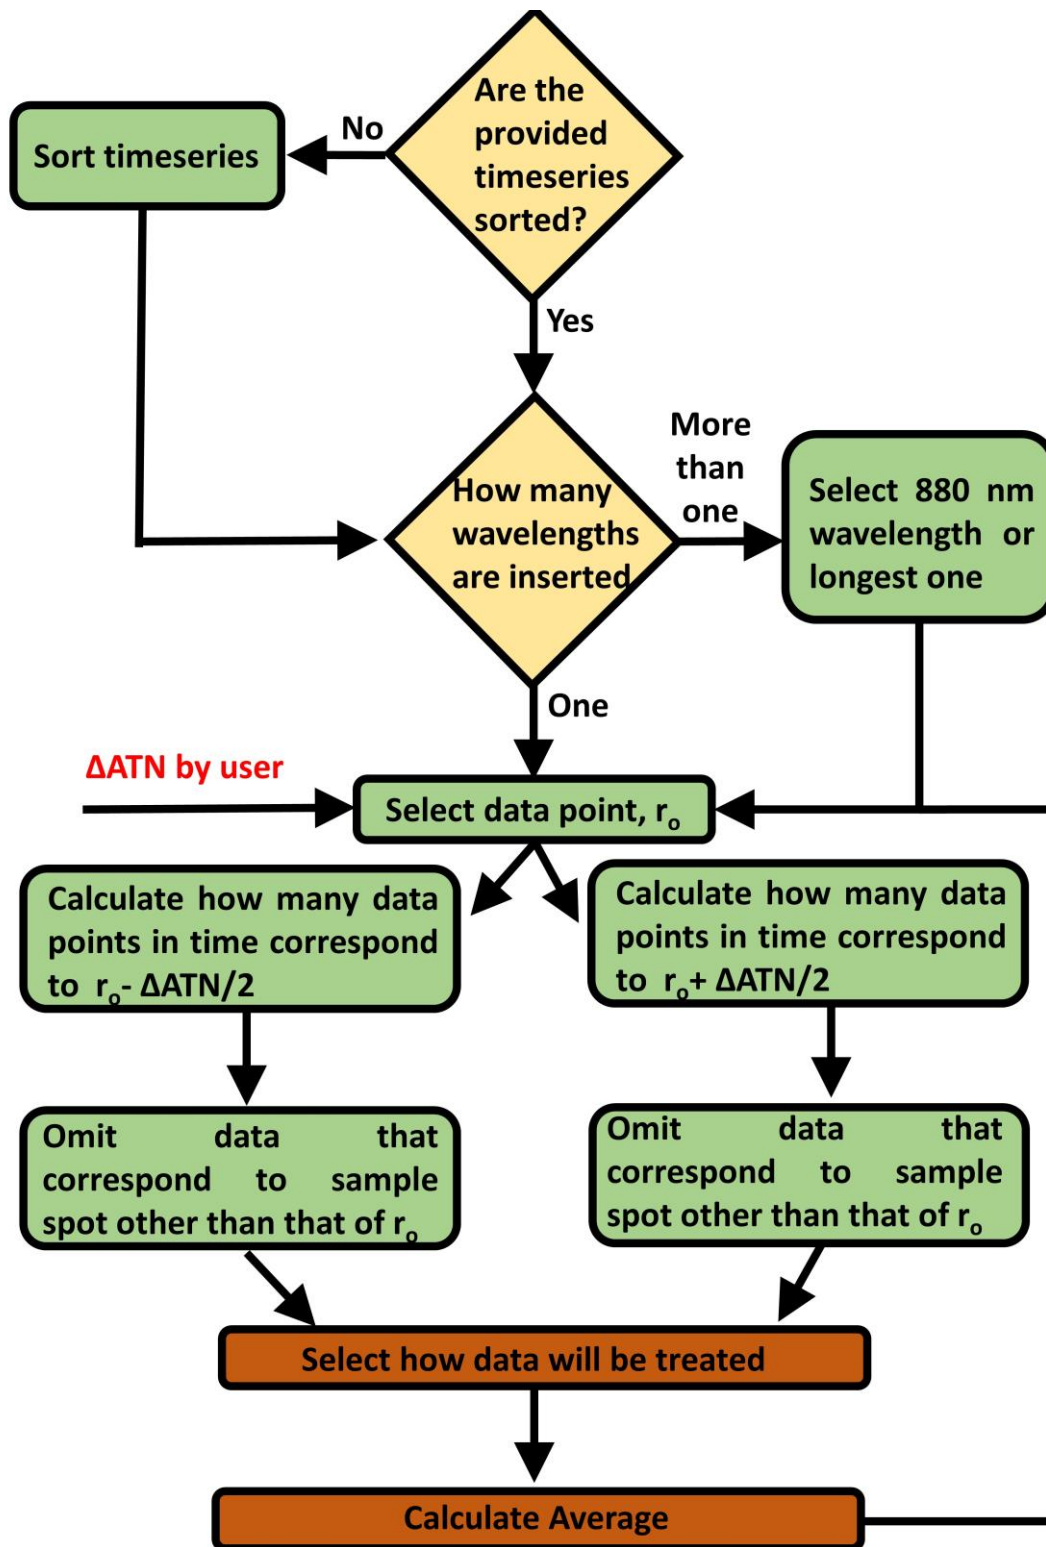

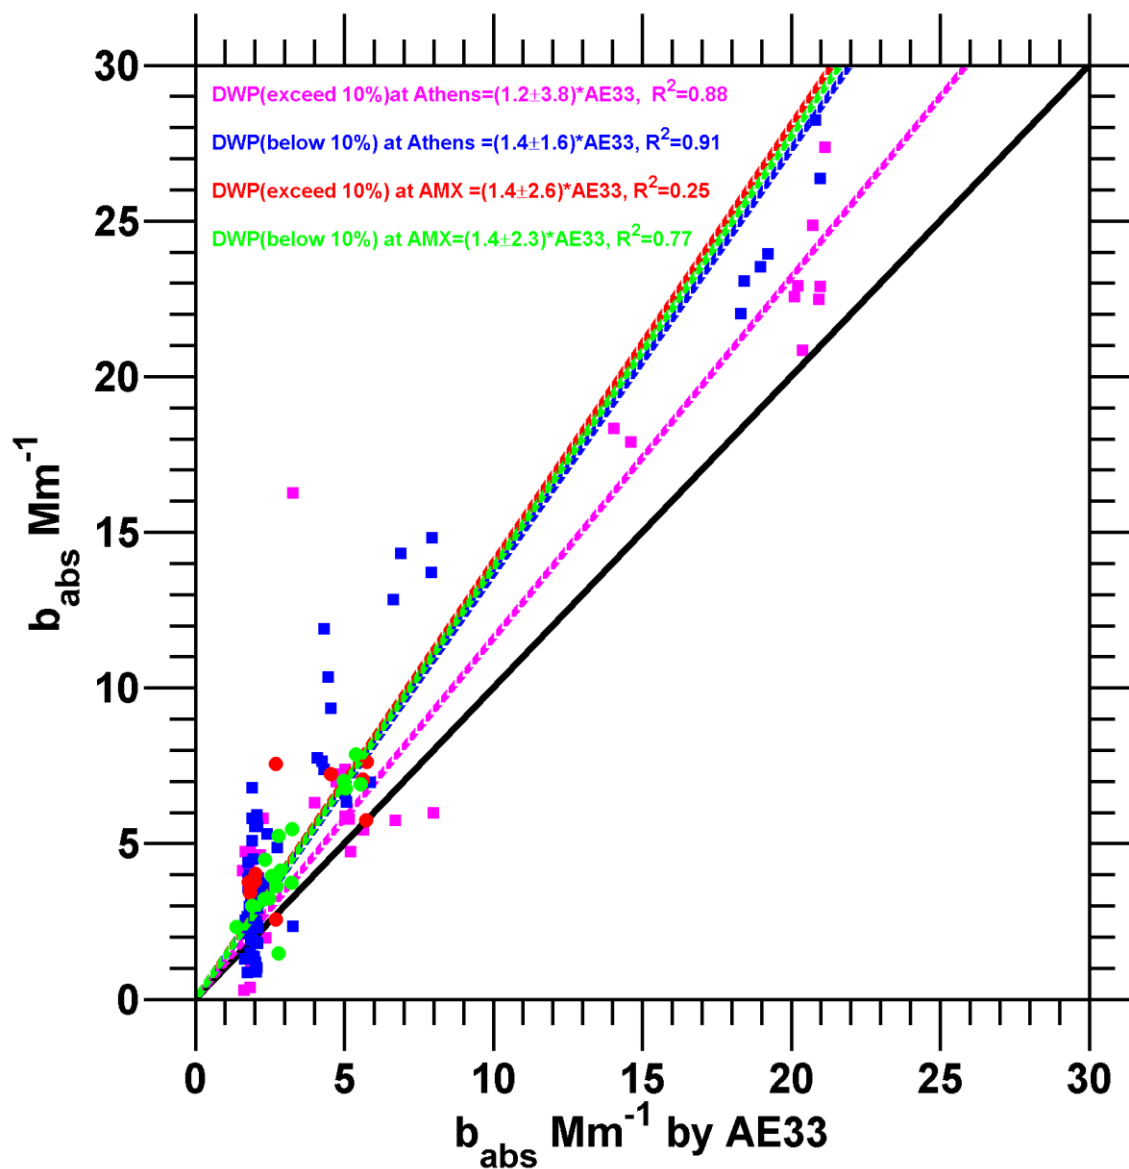

7

8 **Supplemental Figure 2:** Comparison results of DWP against AE33 during flights when attenuation of  
 9 the DWP filter spot exceeded 10%. How the two instruments compared during take-off, when the  
 10 sampling spot was unused, and during landing when an attenuation exceeded 10% is shown. No  
 11 significant difference is found between the two states suggesting that a loading factor equal of 1 can  
 12 be assumed.

13

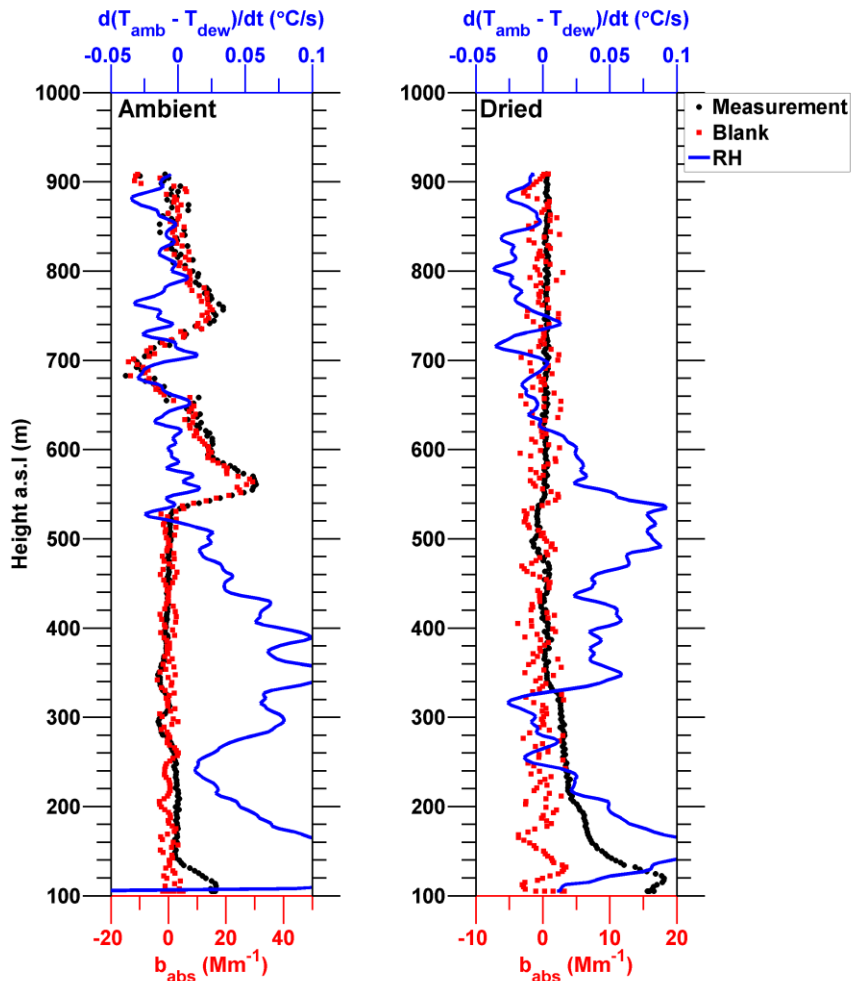

14

15

16 **Supplemental Figure 3:** The effect of humidity on sampling eBC using miniature sensors is shown. Two  
 17 DWP sensors were measuring in series. The first monitored the ambient concentrations (black dots)  
 18 and the second should be measuring a constant blank (red dots). This was the case when the sample  
 19 was dried. Under ambient conditions the blank measurement deviated from zero when the time  
 20 gradient of ambient temperature against the dew point was negative suggesting measurement bias.  
 21 It is noted that the sampling and blank monitors show similar values under this condition.

22

23

24

25

26

27

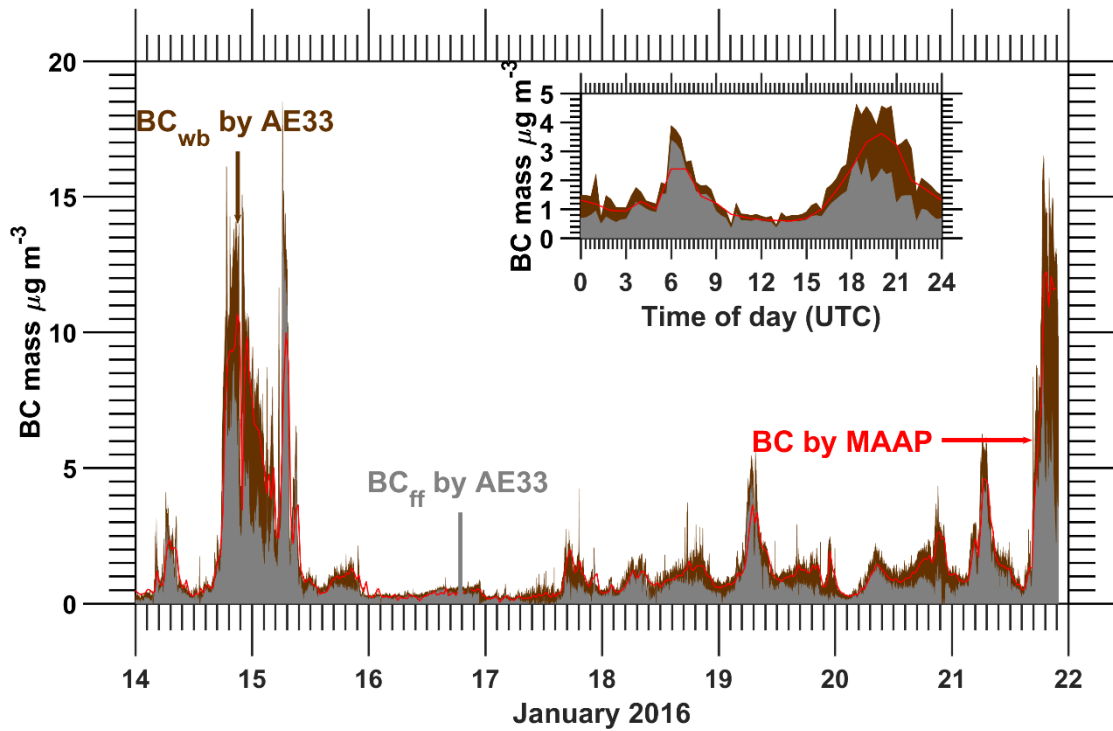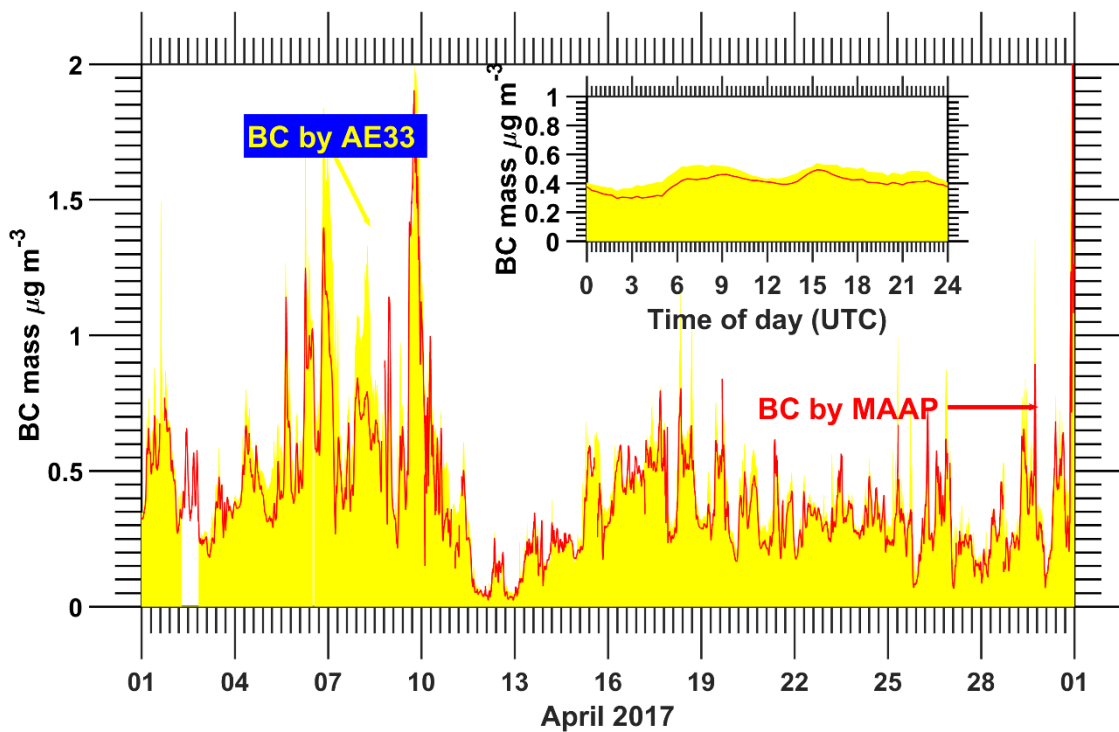

Supplement: Supplementary file 1 [file amt-2019-191-supplement.pdf]
